# Supplementary material for: Synergistic doping and structural engineering over dendritic NiMoCu electrocatalyst enabling highly efficient hydrogen production
Source: Royal Society of Chemistry journal article supplement (doi:10.1039/d2nr03984b), 2022-01-01
Supplement: d2nr03984b4.pdf [file d2nr03984b4.pdf]

Supporting Information for

**Synergistic doping and structural engineering over dendritic NiMoCu electrocatalyst enabling highly efficient hydrogen production**

Ruopeng Li<sup>a</sup>, Yang Yuan<sup>a</sup>, Haoliang Gui<sup>a</sup>, Yaqi Liu<sup>a</sup>, Haoyu Li<sup>a</sup>, Yaqiang Li<sup>a</sup>, Shizheng Wen<sup>c</sup>,  
Anmin Liu<sup>b</sup>, Jinqiu Zhang<sup>a</sup>, Peixia Yang<sup>✉a</sup> and Maozhong An<sup>a</sup>

This profile includes **Computational details, 17 Figures, 4 Tables, 1 Videos, 22 references.**

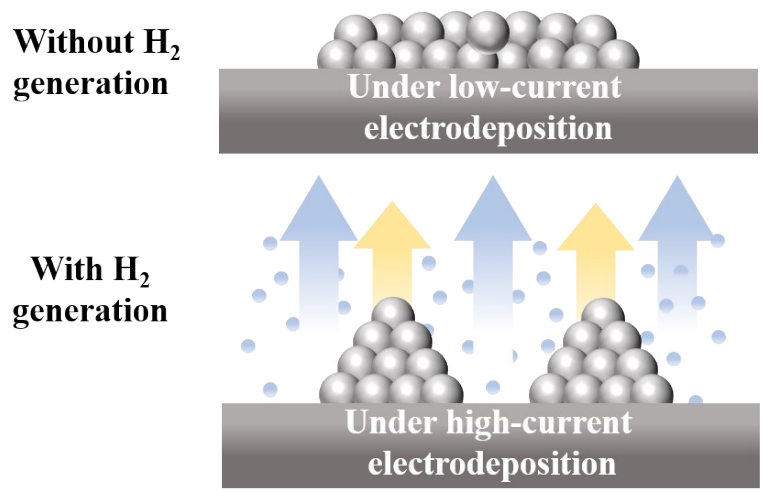

**Figure S1** Schematic illustration of gas-template electrodeposition.

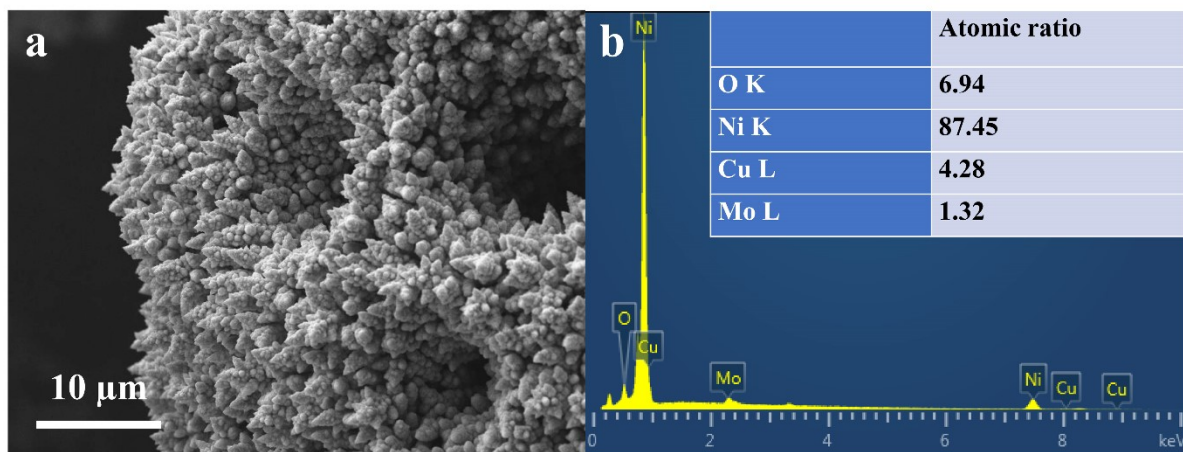

**Figure S2** SEM image and EDS analyses of NiMoCu-NF

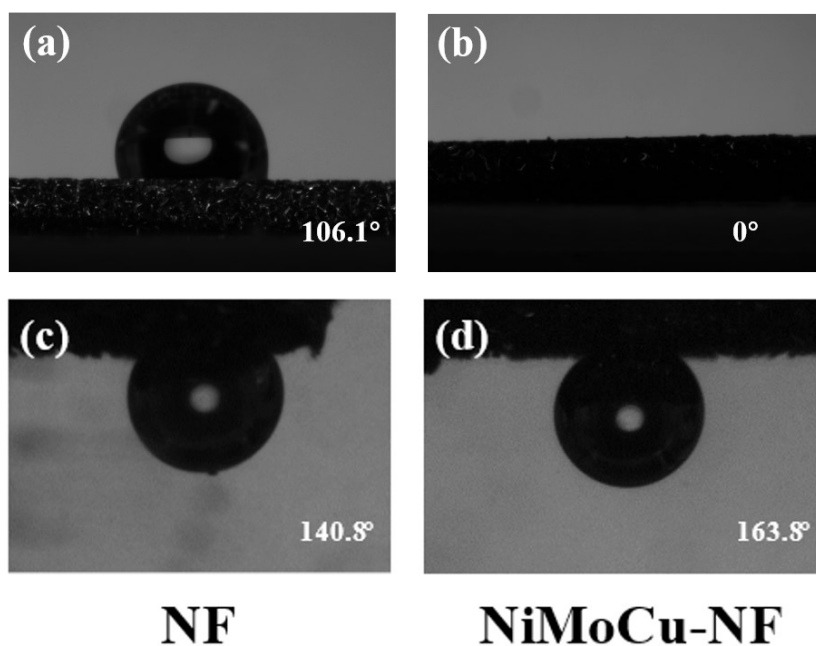

**Figure S3** The liquid contact angle (a, b) and gas evolution angle (c, d) images of NF and NiMoCu-NF, respectively.

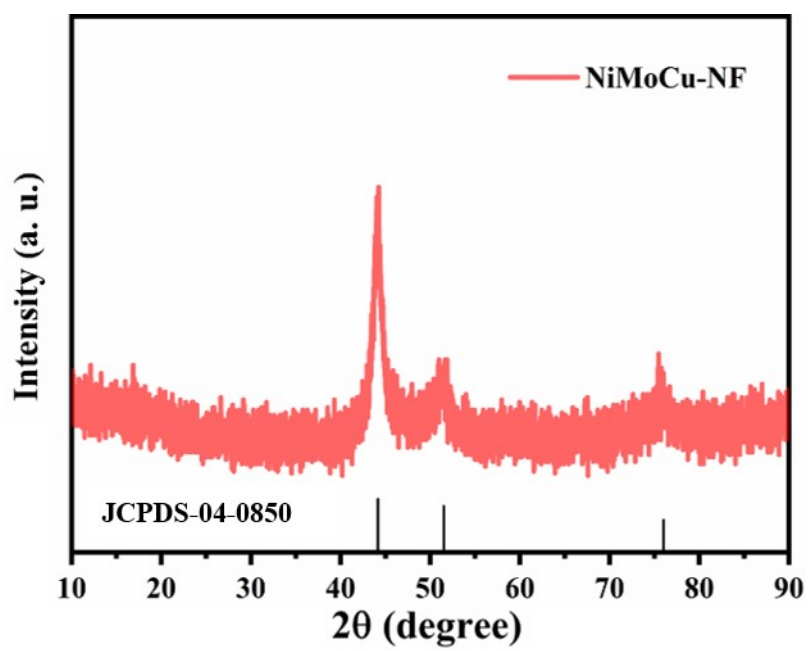

Figure S4 XRD pattern of NiMoCu-NF.

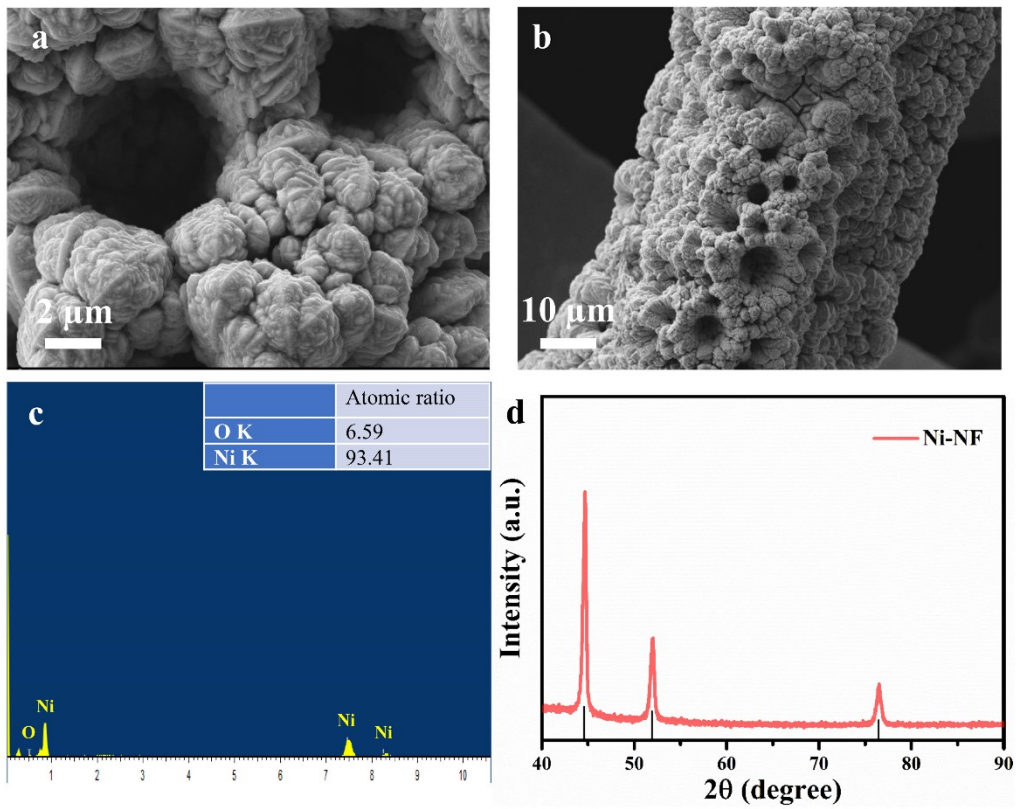

**Figure S5** (a) SEM images (b) EDS analysis and (c) XRD pattern of Ni-NF.

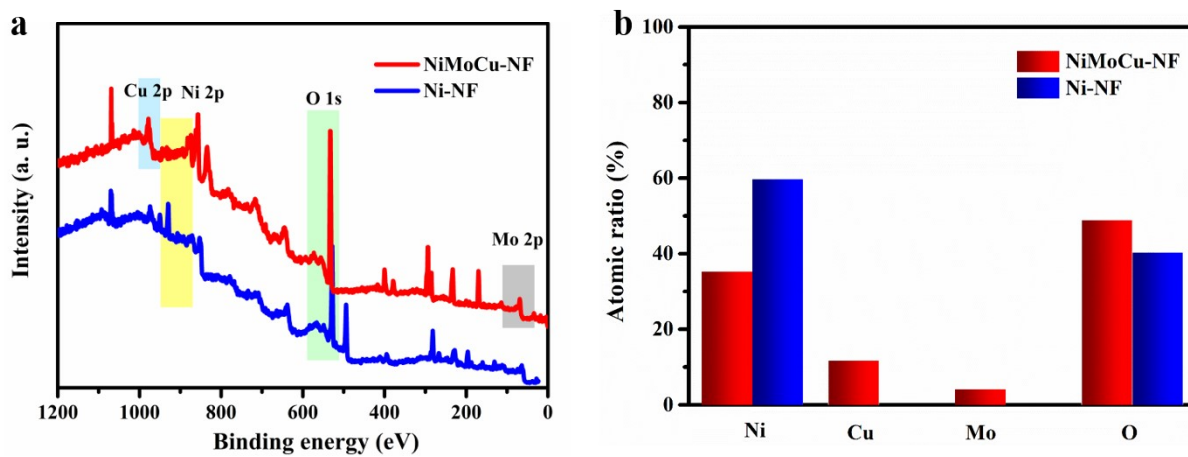

**Figure S6** (a) XPS survey spectrum of NiMoCu-NF and Ni-NF. (b) the corresponding element ratio.

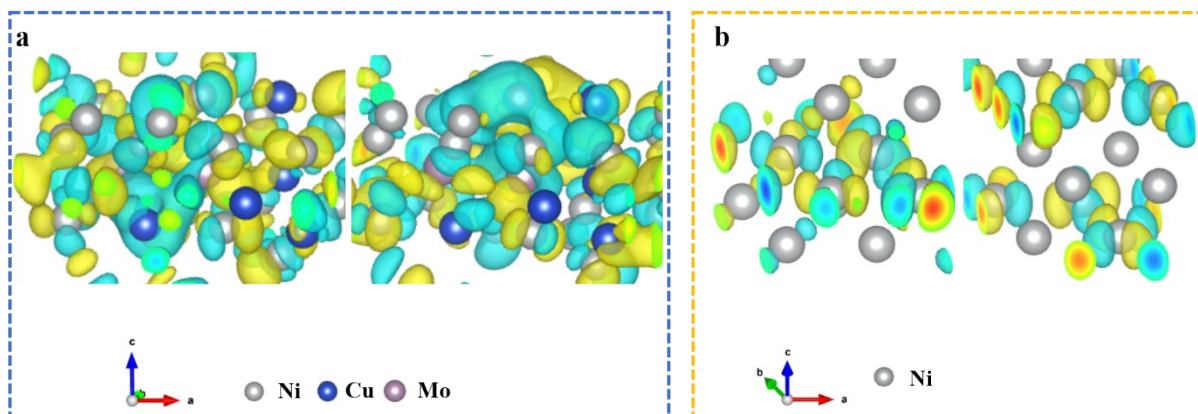

**Figure S7** HOMO and LUMO energy barriers of (a) NiMoCu and (b) Ni.



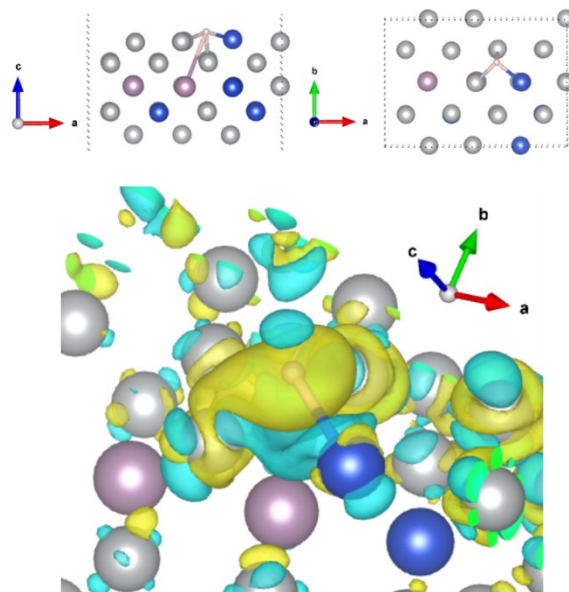

**Figure S8** Simulated electron density distribution of NiMoCu-H.

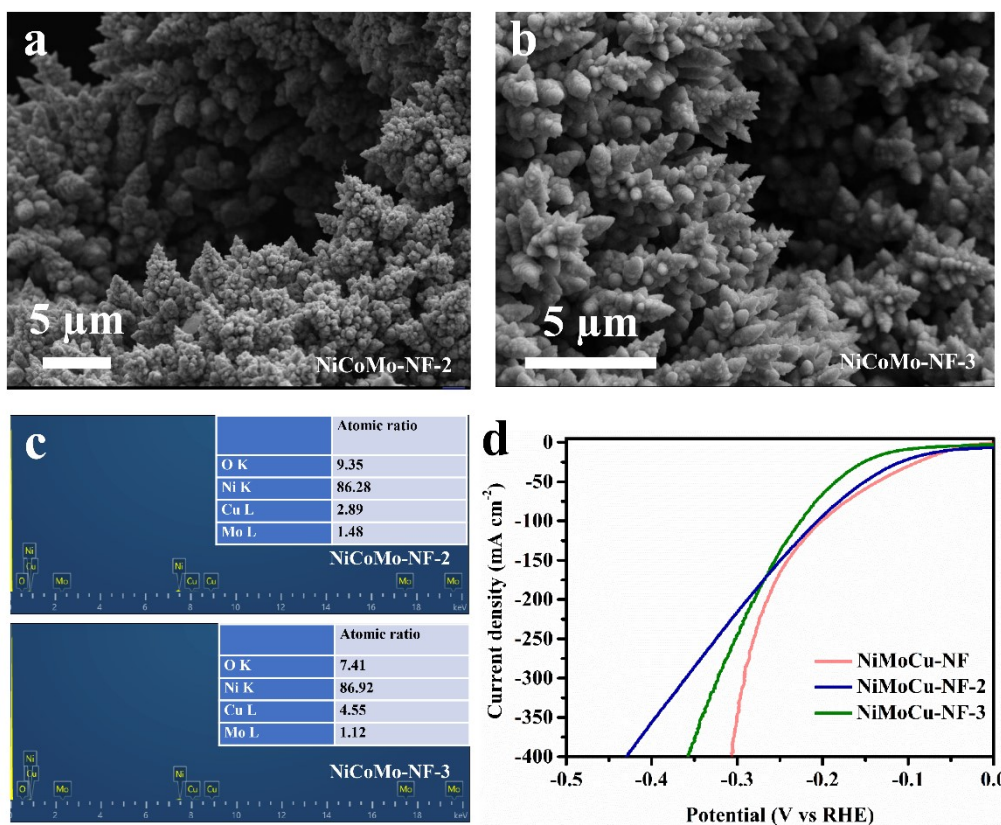

**Figure S9** a-c) SEM images and corresponding EDS spectra of NiMoCu-NF-2 and NiMoCu-NF-3. d) LSV curves of NiMoCu-NF, NiMoCu-NF-2 and NiMoCu-NF-3, respectively.

To explore the effect of compositional changes in NiMoCu catalysts, we prepared a control group by changing the ratio of dopant species in the plating solution. (1) Adjust the concentration of molybdate in the plating solution to 1 g L<sup>-1</sup> and prepare a product, denoted as NiMoCu-NF-2; (2) Adjust the concentration of copper salt in the plating solution to 3 g L<sup>-1</sup> and prepare a product, denoted as NiMoCu-NF-3.

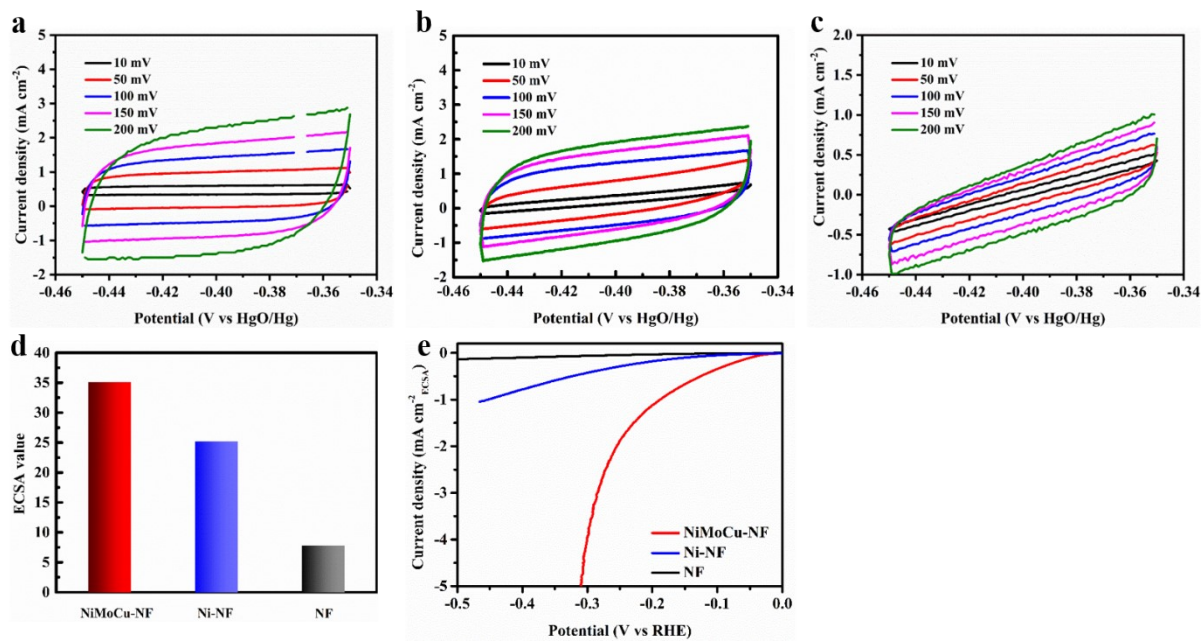

**Figure S10** (a-c) CV curves of NiMoCu-NF, Ni-NF and NF in 1 M KOH solution. (d) calculated ECSA values and (e) ECSA normalized LSV curves of the all-prepared samples.

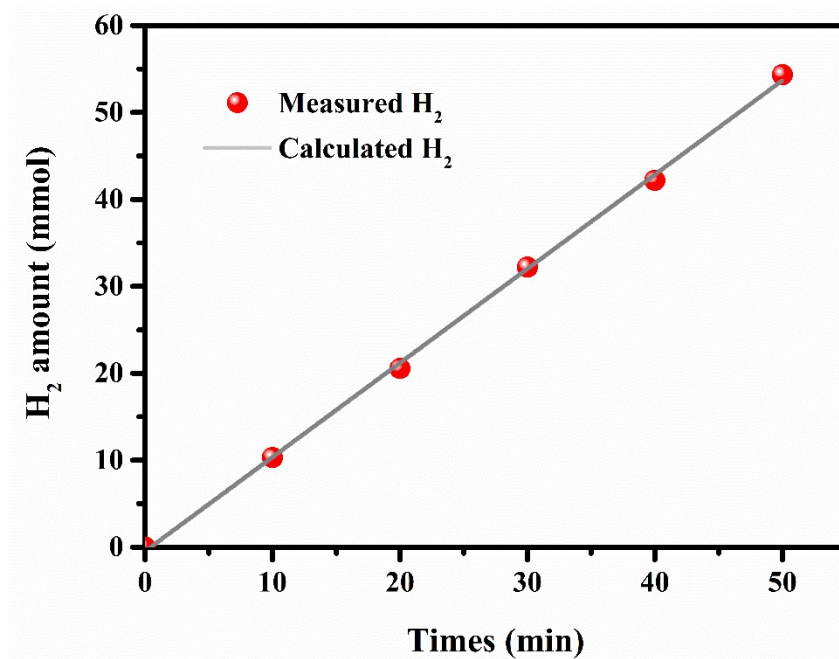

**Figure S11** HER Faradaic efficiency (FE) of NiMoCu-NF under 10 mA cm<sup>-2</sup> measurement.

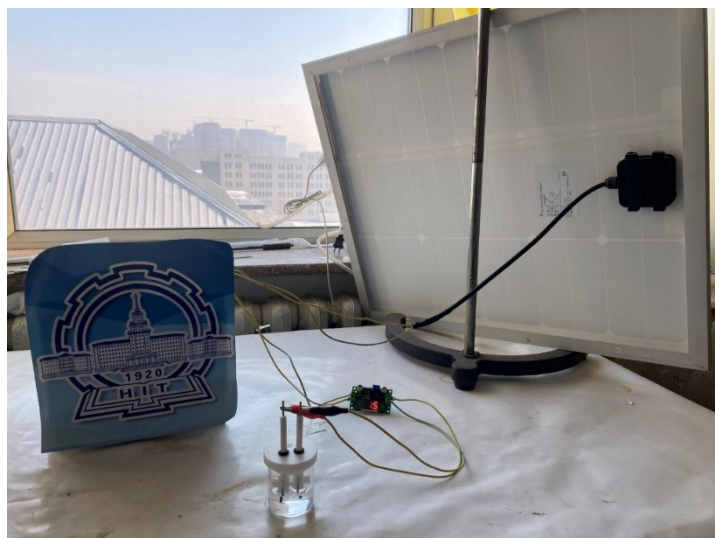

**Figure S12 (a)** Digital image of the solar-power electrolysis system.

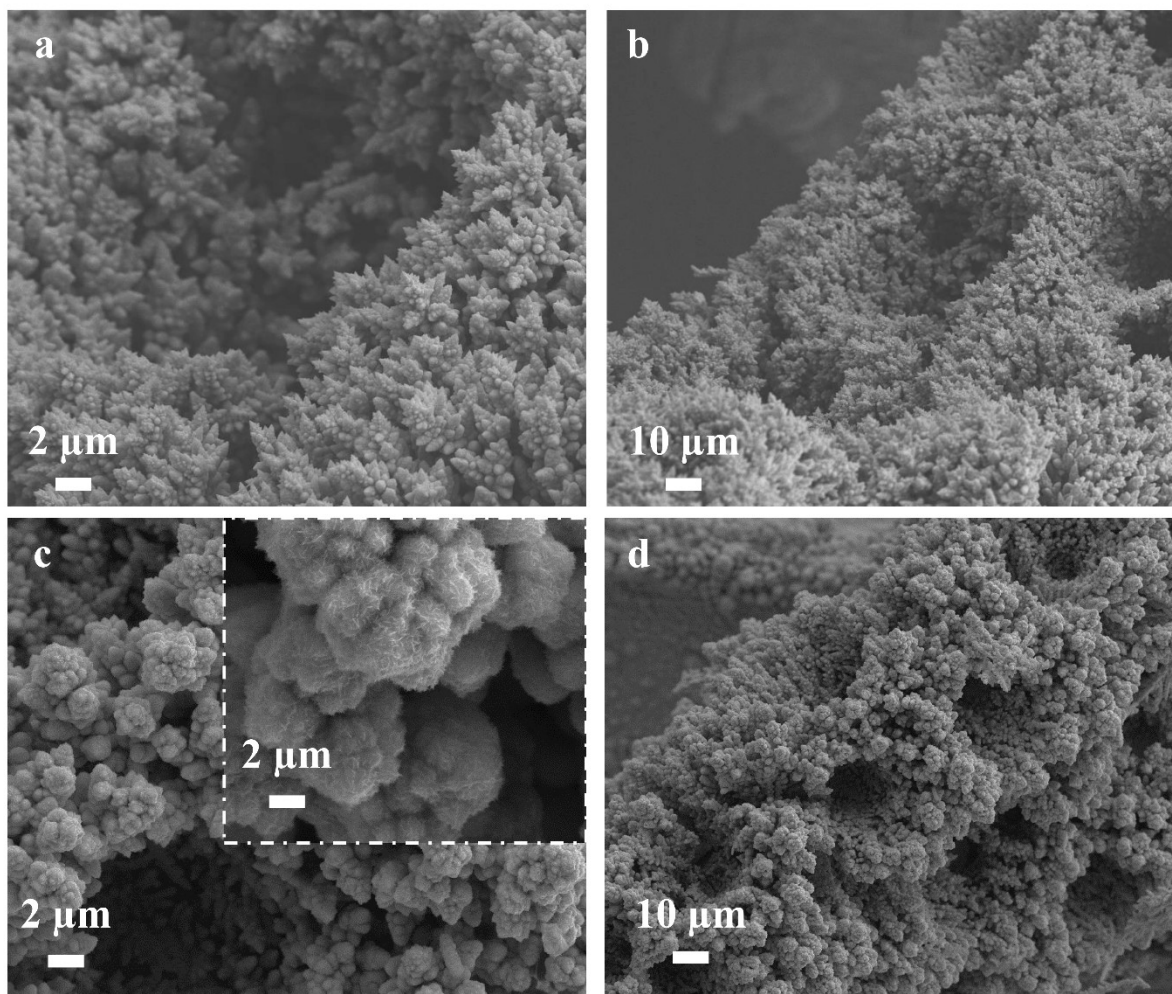

**Figure S13** SEM images NiMoCu-NF after long-term stability test of HER (a, b) and UOR (c, d), respectively.

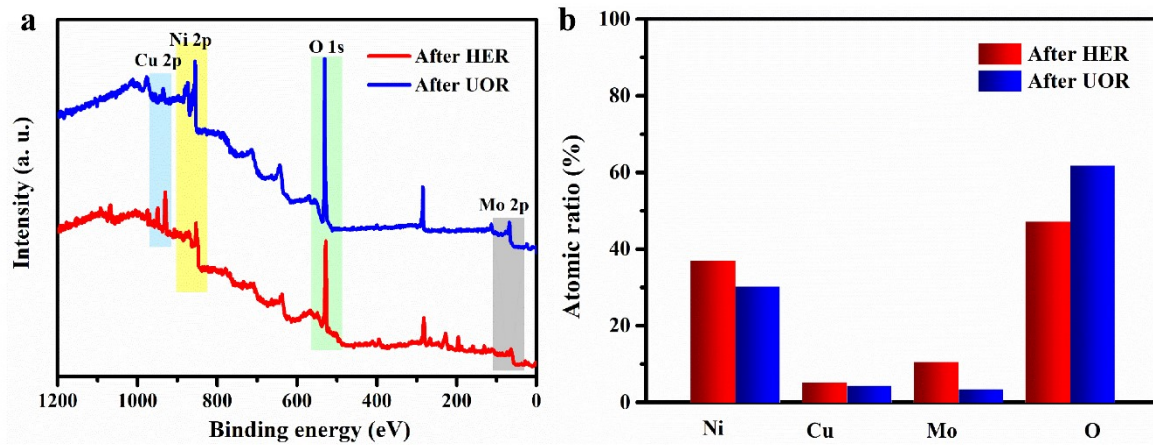

**Figure S14.** (a, b) XPS survey spectra and the corresponded element ratio of NiMoCu-NF after HER and UOR, respectively.

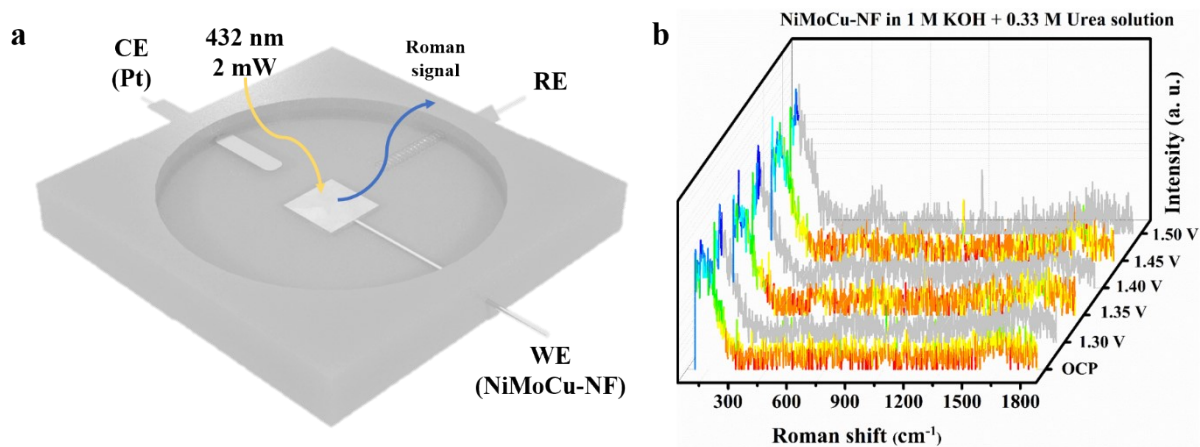

**Figure S15.** (a) Schematic diagram of the in-situ Raman spectroscopy measurement. (b) In-situ Raman spectra of NiMoCu-NF under oxidizing conditions in 1 M KOH + 0.33 M urea.



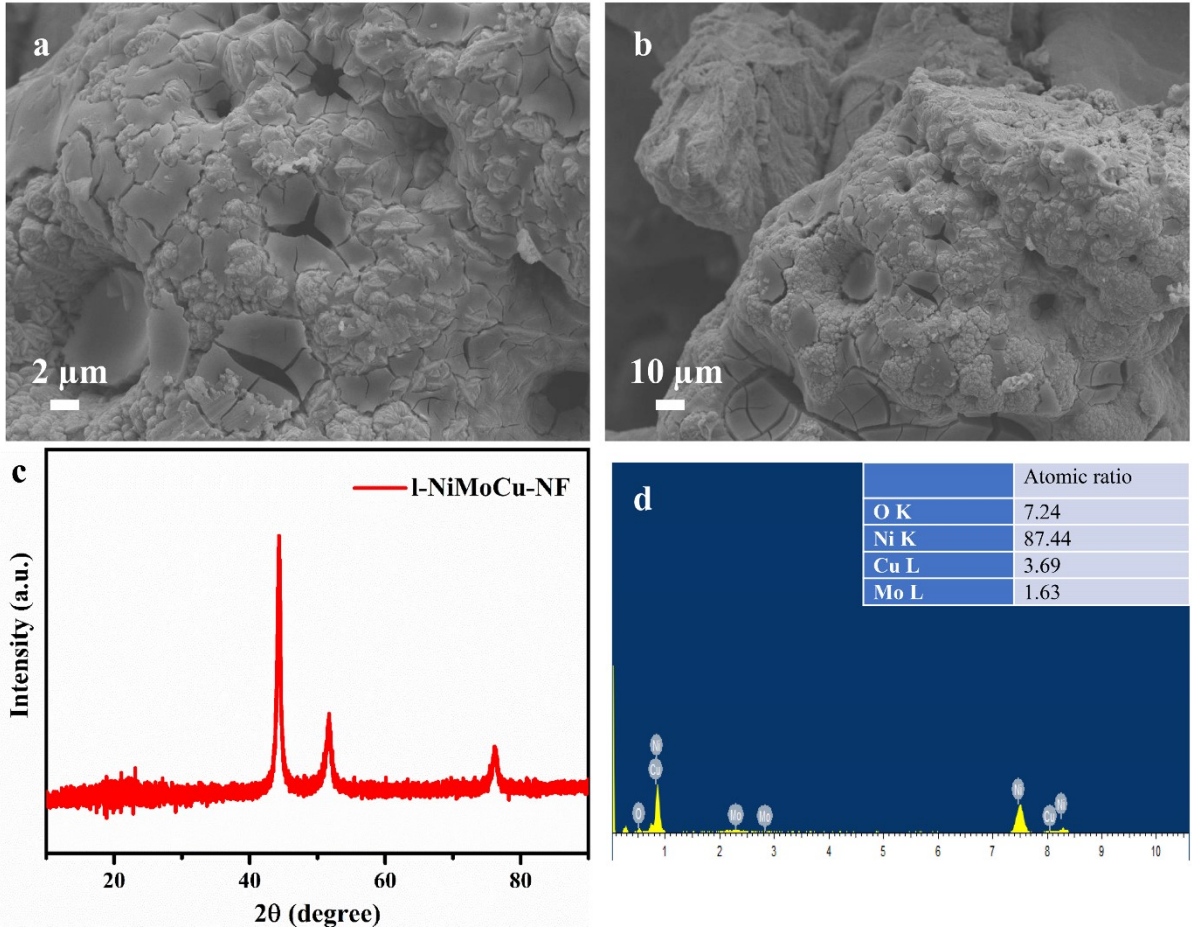

**Figure S16.** (a, b) SEM images (c) XRD pattern and (d) EDS analysis of l-NiMoCu-NF.

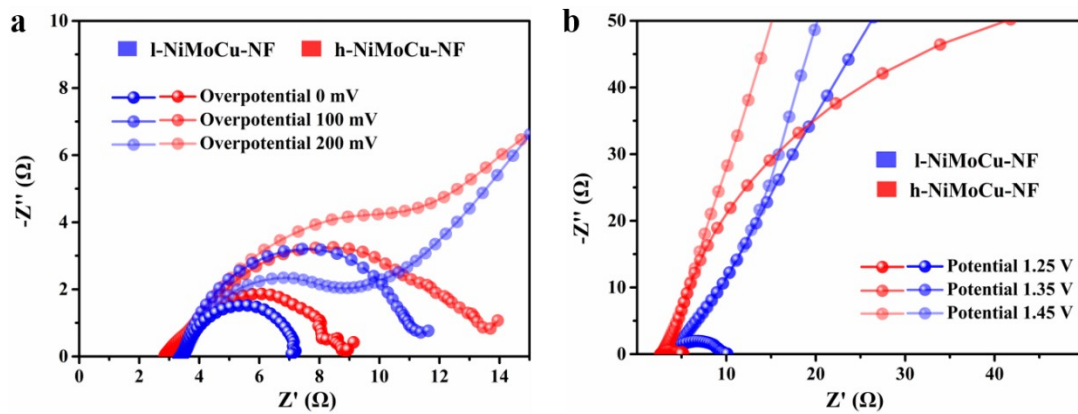

**Figure S17.** Nyquist curves comparing NiMoCu-NF and l-NiMoCu-NF of (a) HER and (b) UOR.

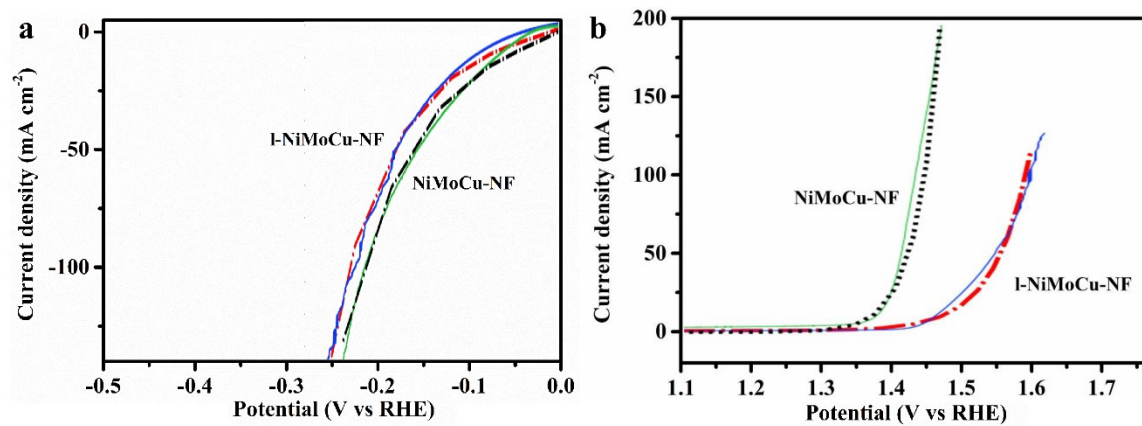

**Figure S18.** Comparison of simulated and tested LSV curves (a) HER and (b) UOR.

**Table S1** ICP analyses of NiCo(OH)<sub>x</sub>-NF, NiFe(OH)<sub>x</sub>-NF, and NiCoFe(OH)<sub>x</sub>-NF

|                                                               | Ni         | Mo           | Cu         |
|---------------------------------------------------------------|------------|--------------|------------|
| <b>NiMoCu-NF</b><br>(Dissolved mass) 4.65 mg cm <sup>-2</sup> | 2.610 mg/L | 0.351 mg/L - | 0.875 mg/L |
| <b>Ni-NF</b><br>(Dissolved mass) 3.37 mg cm <sup>-2</sup>     | 2.702 mg/L |              | -          |

**Table S2.** EIS analyses corresponding to Nyquist curves in Figure S11.

|           | $R_{ct} (\Omega)$ | $R_{\Omega} (\Omega)$ | CPE-T(F) | CPE-P (F) |
|-----------|-------------------|-----------------------|----------|-----------|
| NiMoCu-NF | 1.786             | 2.778                 | 0.1494   | 0.6753    |
| Ni-NF     | 29.633            | 2.817                 | 0.0029   | 0.9006    |
| NF        | 157.5             | 157.5                 | 0.0010   | 0.8018    |

**Table S3.** The HER potential and Tafel slopes of the non-noble metal-based HER in 1 M KOH solution.

| Catalyst                                                                         | Potential ( $\eta_{10}$ ) | electrolyte | Tafel slope (mV dec <sup>-1</sup> ) | Ref.             |
|----------------------------------------------------------------------------------|---------------------------|-------------|-------------------------------------|------------------|
| NiMoCu-NF                                                                        | 52                        | 1.0 M KOH   | 52                                  | <b>This Work</b> |
| NiSe <sub>2</sub> NTA                                                            | 60                        | 1.0 M KOH   | 65                                  | [1]              |
| CoNiMoO NWs                                                                      | 60                        | 1.0 M KOH   | 73                                  | [2]              |
| CuCoO NWs                                                                        | 85                        | 1.0 M KOH   | 108                                 | [3]              |
| Ni/NiO-CNT                                                                       | 80                        | 1.0 M KOH   | 82                                  | [4]              |
| Ni <sub>x</sub> B/MWCNT                                                          | 116                       | 1.0 M KOH   | 70.4                                | [5]              |
| O-NiMoP/NF                                                                       | 55                        | 1.0 M KOH   | 49                                  | [6]              |
| S-NiCu-O(OH)/NF                                                                  | 146                       | 1.0 M KOH   | 64                                  | [7]              |
| reduced MoS <sub>2</sub>                                                         | 71                        | 1.0 M KOH   | 100                                 | [8]              |
| Ni <sub>x</sub> Co <sub>3-x</sub> S <sub>4</sub> /Ni <sub>3</sub> S <sub>2</sub> | 136                       | 1.0 M KOH   | 107                                 | [9]              |
| Co-P/NF                                                                          | 70                        | 1 M KOH     | 68                                  | [10]             |
| Ni-0.2NH <sub>3</sub>                                                            | 61                        | 1 M KOH     | 71                                  | [11]             |
| Co-Ni-B NSs                                                                      | 80                        | 1.0 M KOH   | 88.2                                | [12]             |

**Table S4.** The HER potential and Tafel slopes of the non-noble metal-based HER in 1 M KOH solution.

| Catalys                                                   | SEM                                                                                 | Electrolyte              | Cell Voltage (V) 10 mA cm <sup>-2</sup> | Ref.             |
|-----------------------------------------------------------|-------------------------------------------------------------------------------------|--------------------------|-----------------------------------------|------------------|
| 1%Cu:α-Ni(OH) <sub>2</sub>                                | 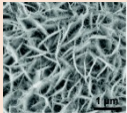   | 1.0 M KOH<br>0.33 M urea | 1.49                                    | [13]             |
| Ni(OH) <sub>2</sub> NS@NW/NF                              |    | 1.0 M KOH<br>0.33 M urea | 1.58                                    | [14]             |
| Ni <sub>9</sub> S <sub>8</sub> /CuS/Cu <sub>2</sub> O /NF |    | 1.0 M KOH<br>0.33 M urea | 1.47                                    | [7]              |
| NiCo <sub>2</sub> S <sub>4</sub> NS                       |   | 1.0 M KOH<br>0.33 M urea | 1.45                                    | [15]             |
| Ni <sub>0.9</sub> Fe <sub>0.1</sub> O <sub>x</sub>        |  | 1.0 M KOH<br>0.33 M urea | 1.455                                   | [16]             |
| Ni <sub>3</sub> N NA/CC                                   |  | 1.0 M KOH<br>0.33 M urea | 1.44                                    | [17]             |
| Ni/C                                                      |  | 1.0 M KOH<br>0.33 M urea | 1.60                                    | [18]             |
| Ni–Mo nanotube                                            |  | 1.0 M KOH<br>0.5 M urea  | 1.43                                    | [19]             |
| NiTe/rGO/NF                                               |  | 1.0 M KOH<br>0.33 M urea | 1.5                                     | [20]             |
| Ni <sub>2</sub> P/CFC                                     |  | 1.0 M KOH<br>0.33 M urea | 1.44                                    | [21]             |
| Fe <sub>11.1%</sub> -Ni <sub>3</sub> S <sub>2</sub> /NF   |  | 1.0 M KOH<br>0.33 M urea | 1.46                                    | [22]             |
| NiMoCu-NF                                                 |  | 1.0 M KOH<br>0.33 M urea | 1.386                                   | <b>This Work</b> |

**Movie S1** Liquid contact process of NF.

**Movie S2** Liquid contact process of NiMoCu-NF.

**Movie S3** NiMoCu -NF || NiMoCu-NF electrolyze driven by a solar-powered system at 1.5 V.



## References

- [1] X. Teng, J. Wang, L. Ji, Y. Lv, Z. Chen, Ni nanotube array-based electrodes by electrochemical alloying and de-alloying for efficient water splitting, *Nanoscale* 10(19) (2018) 9276-9285. <https://doi.org/10.1039/c8nr02238k>.
- [2] B. Ren, D. Li, Q. Jin, H. Cui, C. Wang, In-situ Tailoring Cobalt Nickel Molybdenum Oxide Components for Overall Water-Splitting at High Current Densities, *Chemelectrochem* 6(2) (2019) 413-420. <https://doi.org/10.1002/celec.201801386>.
- [3] M. Kuang, P. Han, Q. Wang, J. Li, G. Zheng, CuCo Hybrid Oxides as Bifunctional Electrocatalyst for Efficient Water Splitting, *Advanced Functional Materials* 26(46) (2016) 8555-8561. <https://doi.org/10.1002/adfm.201604804>.
- [4] M. Gong, W. Zhou, M.-C. Tsai, J. Zhou, M. Guan, M.-C. Lin, B. Zhang, Y. Hu, D.-Y. Wang, J. Yang, S.J. Pennycook, B.-J. Hwang, H. Dai, Nanoscale nickel oxide/nickel heterostructures for active hydrogen evolution electrocatalysis, *Nature Communications* 5 (2014). <https://doi.org/10.1038/ncomms5695>.
- [5] X. Chen, Z. Yu, L. Wei, Z. Zhou, S. Zhai, J. Chen, Y. Wang, Q. Huang, H.E. Karahan, X. Liao, Y. Chen, Ultrathin nickel boride nanosheets anchored on functionalized carbon nanotubes as bifunctional electrocatalysts for overall water splitting, *Journal of Materials Chemistry A* 7(2) (2019) 764-774. <https://doi.org/10.1039/c8ta09130g>.
- [6] H. Jiang, M. Sun, S. Wu, B. Huang, C.-S. Lee, W. Zhang, Oxygen-Incorporated NiMoP Nanotube Arrays as Efficient Bifunctional Electrocatalysts For Urea-Assisted Energy-Saving Hydrogen Production in Alkaline Electrolyte, *Advanced Functional Materials* 31(43) (2021). <https://doi.org/10.1002/adfm.202104951>.
- [7] D. Wei, W. Tang, Y. Wang, Hairy sphere-like Ni<sub>9</sub>S<sub>8</sub>/CuS/Cu<sub>2</sub>O composites grown on nickel foam as bifunctional electrocatalysts for hydrogen evolution and urea electrooxidation, *International Journal of Hydrogen Energy* 46(40) (2021) 20950-20960. <https://doi.org/10.1016/j.ijhydene.2021.03.206>.
- [8] M.A.R. Anjum, H.Y. Jeong, M.H. Lee, H.S. Shin, J.S. Lee, Efficient Hydrogen Evolution Reaction Catalysis in Alkaline Media by All-in-One MoS<sub>2</sub> with Multifunctional Active Sites, *Advanced Materials* 30(20) (2018). <https://doi.org/10.1002/adma.201707105>.
- [9] Y. Wu, Y. Liu, G.-D. Li, X. Zou, X. Lian, D. Wang, L. Sun, T. Asefa, X. Zou, Efficient electrocatalysis of overall water splitting by ultras-small Ni<sub>x</sub>Co<sub>3-x</sub>S<sub>4</sub> coupled Ni<sub>3</sub>S<sub>2</sub> nanosheet arrays, *Nano Energy* 35 (2017) 161-170. <https://doi.org/10.1016/j.nanoen.2017.03.024>.
- [10] M. Song, Z. Zhang, Q. Li, W. Jin, Z. Wu, G. Fu, X. Liu, Ni-foam supported Co(OH)F and Co-P nanoarrays for energy-efficient hydrogen production via urea electrolysis, *Journal of*

- Materials Chemistry A 7(8) (2019) 3697-3703. <https://doi.org/10.1039/c8ta10985k>.
- [11] T. Wang, Q. Zhou, X. Wang, J. Zheng, X. Li, MOF-derived surface modified Ni nanoparticles as an efficient catalyst for the hydrogen evolution reaction, *Journal of Materials Chemistry A* 3(32) (2015) 16435-16439. <https://doi.org/10.1039/c5ta04001a>.
- [12] M. Sheng, Q. Wu, Y. Wang, F. Liao, Q. Zhou, J. Hou, W. Weng, Network-like porous Co-Ni-B grown on carbon cloth as efficient and stable catalytic electrodes for hydrogen evolution, *Electrochemistry Communications* 93 (2018) 104-108. <https://doi.org/10.1016/j.elecom.2018.06.017>.
- [13] J. Xie, L. Gao, S. Cao, W. Liu, F. Lei, P. Hao, X. Xia, B. Tang, Copper-incorporated hierarchical wire-on-sheet  $\alpha$ -Ni(OH)<sub>2</sub> nanoarrays as robust trifunctional catalysts for synergistic hydrogen generation and urea oxidation, *Journal of Materials Chemistry A* 7(22) (2019) 13577-13584. <https://doi.org/10.1039/c9ta02891a>.
- [14] Z. Yue, S. Yao, Y. Li, W. Zhu, W. Zhang, R. Wang, J. Wang, L. Huang, D. Zhao, J. Wang, Surface engineering of hierarchical Ni(OH)<sub>2</sub> nanosheet@nanowire configuration toward superior urea electrolysis, *Electrochimica Acta* 268 (2018) 211-217. <https://doi.org/10.1016/j.electacta.2018.02.059>.
- [15] W. Zhu, M. Ren, N. Hu, W. Zhang, Z. Luo, R. Wang, J. Wang, L. Huang, Y. Suo, J. Wang, Traditional NiCo<sub>2</sub>S<sub>4</sub> Phase with Porous Nanosheets Array Topology on Carbon Cloth: A Flexible, Versatile and Fabulous Electrocatalyst for Overall Water and Urea Electrolysis, *Acs Sustainable Chemistry & Engineering* 6(4) (2018) 5011-5020. <https://doi.org/10.1021/acssuschemeng.7b04663>.
- [16] F.C. Wu, G. Ou, J. Yang, H.N. Li, Y.X. Gao, F.M. Chen, Y. Wang, Y.M. Shi, Bifunctional nickel oxide-based nanosheets for highly efficient overall urea splitting, *Chemical Communications* 55(46) (2019) 6555-6558. <https://doi.org/10.1039/c9cc02507c>.
- [17] Q. Liu, L. Xie, F. Qu, Z. Liu, G. Du, A.M. Asiri, X. Sun, A porous Ni<sub>3</sub>N nanosheet array as a high-performance non-noble-metal catalyst for urea-assisted electrochemical hydrogen production, *Inorganic Chemistry Frontiers* 4(7) (2017) 1120-1124. <https://doi.org/10.1039/c7qi00185a>.
- [18] L. Wang, L. Ren, X. Wang, X. Feng, J. Zhou, B. Wang, Multivariate MOF-Templated Pomegranate-Like Ni/C as Efficient Bifunctional Electrocatalyst for Hydrogen Evolution and Urea Oxidation, *Acs Applied Materials & Interfaces* 10(5) (2018) 4750-4756. <https://doi.org/10.1021/acsaami.7b18650>.
- [19] J.-Y. Zhang, T. He, M. Wang, R. Qi, Y. Yan, Z. Dong, H. Liu, H. Wang, B.Y. Xia, Energy-saving hydrogen production coupling urea oxidation over a bifunctional nickel-molybdenum nanotube array, *Nano Energy* 60 (2019) 894-902. <https://doi.org/10.1016/j.nanoen.2019.04.035>.

- [20] Z. Wang, P. Guo, M. Liu, C. Guo, H. Liu, S. Wei, J. Zhang, X. Lu, Rational Design of Metallic NiTex ( $x=1$  or  $2$ ) as Bifunctional Electrocatalysts for Efficient Urea Conversion, *Acs Applied Energy Materials* 2(5) (2019) 3363-3372. <https://doi.org/10.1021/acsaem.9b00208>.
- [21] L. Xie, Q. Liu, Y. Luo, Z. Liu, Y. Xu, A.M. Asiri, X. Sun, F. Xie, Bimetallic NiCoP Nanosheets Array for High-Performance Urea Electro-Oxidation and Less Energy-Intensive Electrolytic Hydrogen Production, *Chemistryselect* 2(31) (2017) 10285-10289. <https://doi.org/10.1002/slct.201702071>.
- [22] W. Zhu, Z. Yue, W. Zhang, N. Hu, Z. Luo, M. Ren, Z. Xu, Z. Wei, Y. Suo, J. Wang, Wet-chemistry topotactic synthesis of bimetallic iron-nickel sulfide nanoarrays: an advanced and versatile catalyst for energy efficient overall water and urea electrolysis, *Journal of Materials Chemistry A* 6(10) (2018) 4346-4353. <https://doi.org/10.1039/c7ta10584c>.
